# Supplementary material
Source: PubMed Central journal article supplement (PMC1941813)

DNA

gamma-H2AX

Overlaid

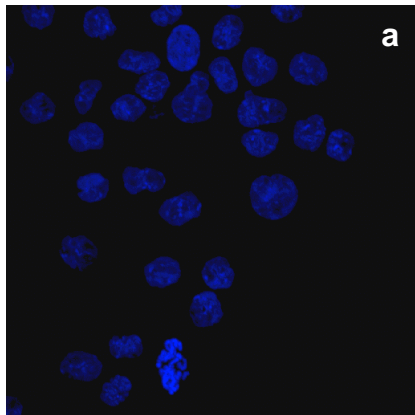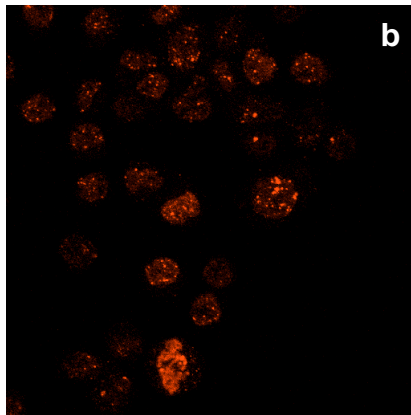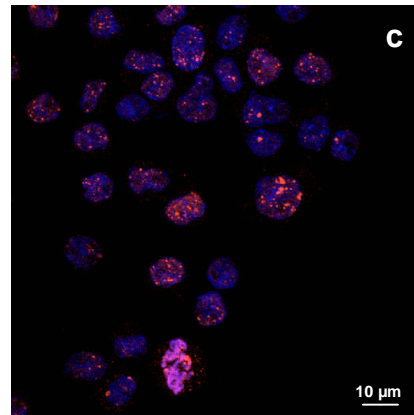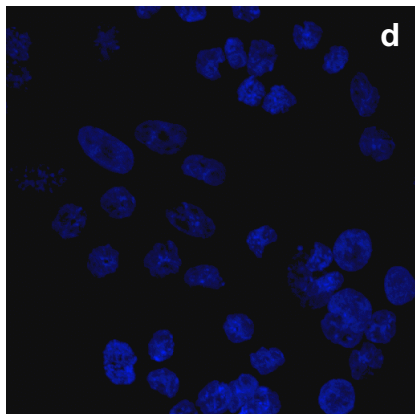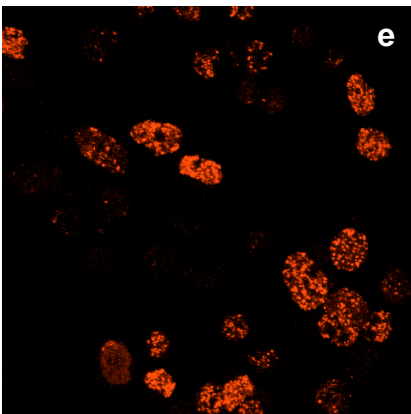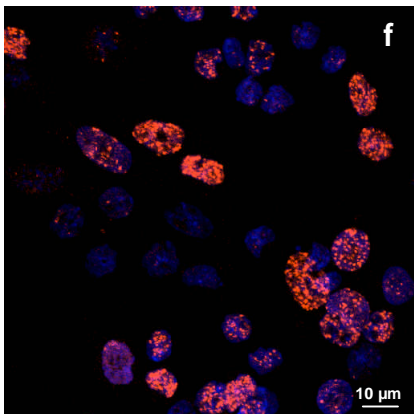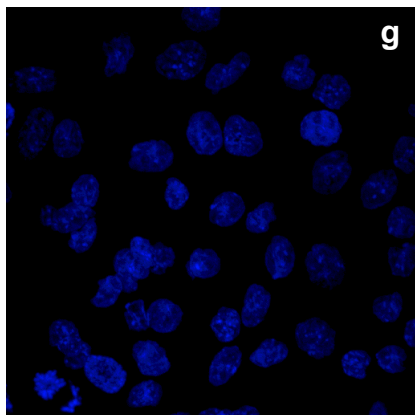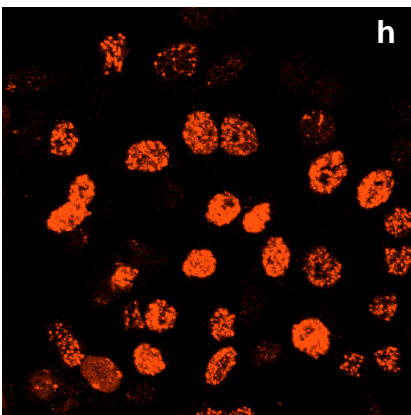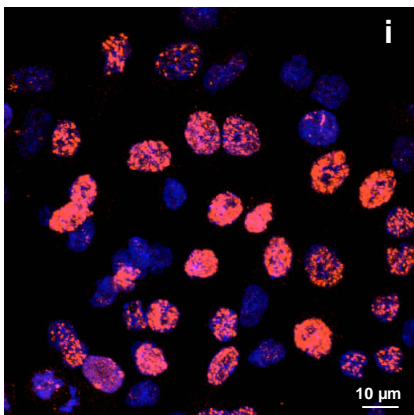

Supplement: pnas_0609877104_1.pdf [file pnas_0609877104_1.pdf]

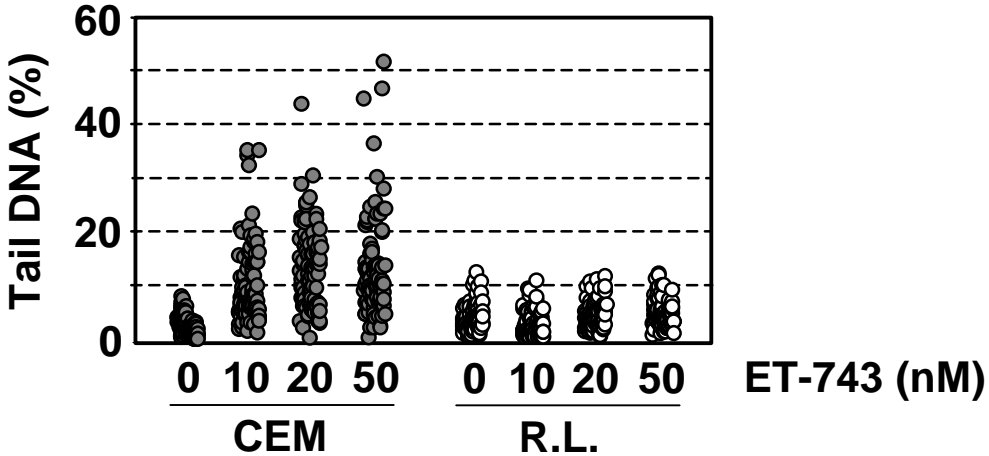

Supplement: pnas_0609877104_2.pdf [file pnas_0609877104_2.pdf]

**A**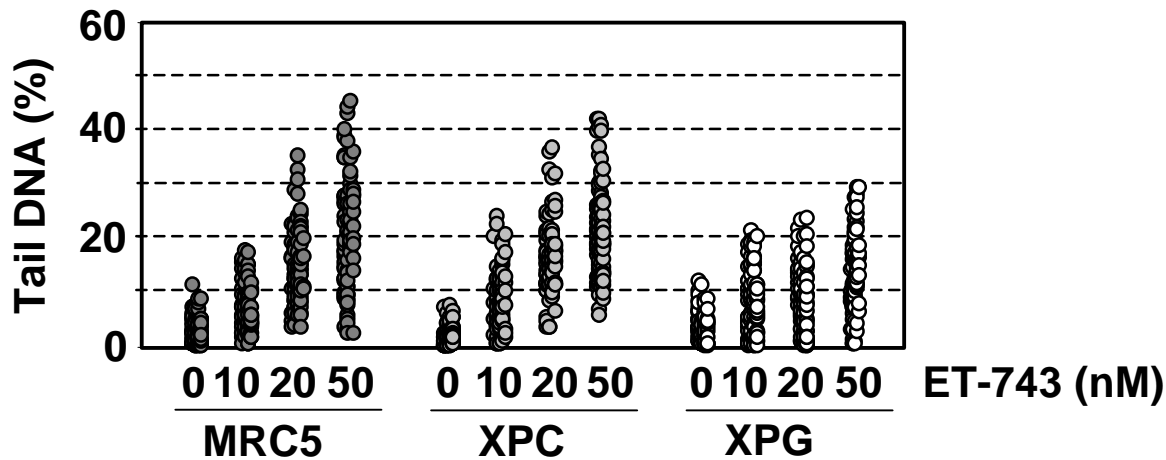**B**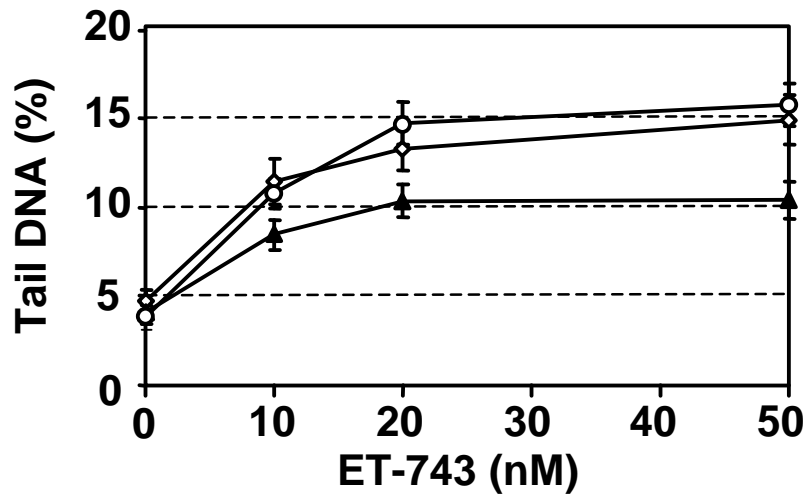

Supplement: pnas_0609877104_3.pdf [file pnas_0609877104_3.pdf]
